# Supplementary material for: Synergetic Cooperation of microRNAs with Transcription Factors in iPS Cell Generation
Source: PLoS One. 2012 Jul 13;7(7):e40849. doi: 10.1371/journal.pone.0040849 (PMC3396613; doi:10.1371/journal.pone.0040849)
Supplement: Table S3 — Genes targeted by transcription factors (OSKM) directly. (XLS) [file pone.0040849.s005.xls]

## Sheet: Sheet1
Gene ID	Gene Name	Relative Expression Level log2(iPSC/MEF))	Targeted by TFs (OSKM)
NM_001002929	Nup85	1.37433	M
NM_001003919	Ddx11	1.61956	M
NM_001004359	Gprasp1	3.10956	OM
NM_001004365	Actr3b	2.6563	M
NM_001005509	Eif2a	1.06267	M
NM_001007596	Rtn1	3.04643	K
NM_001008421	Nol10	1.38203	M
NM_001010833	Mdc1	1.56563	OSM
NM_001012273	Birc5	1.75926	M
NM_001012450	Ankrd6	2.52979	O
NM_001012451	Ankrd6	2.52979	OS
NM_001013256	1500010J02Rik	1.37498	M
NM_001013375	Utp18	1.06328	OM
NM_001013385	Grm4	2.88897	OS
NM_001013387	Zfp182	1.24607	OSK
NM_001013745	Zfp57	3.73817	OS
NM_001013756	Grhl3	4.36192	K
NM_001015099	6030408C04Rik	1.72008	OSM
NM_001017983	Foxred2	2.10158	M
NM_001018002	Dppa4	7.0726	OSK
NM_001024699	ZBTB45	1.43472	OSK
NM_001024917	B3bp /// LOC100044124	1.39094	OS
NM_001024918	Rfx4	2.30646	OS
NM_001025382	EG574403	1.91257	OS
NM_001025600	Cadm1	2.0717	O
NM_001029842	Slc16a6	2.90413	O
NM_001029843	Vrk1	1.50167	O
NM_001029868	Pdzd4	1.89057	OM
NM_001029876	AK122209	1.73725	M
NM_001030307	Dkc1	2.60901	M
NM_001033166	2700094K13Rik	1.08866	M
NM_001033243	Ccdc114	2.26112	KM
NM_001033250	Lemd1	1.35249	K
NM_001033344	Dusp27	2.94591	OSK
NM_001033389	Fubp3	1.20612	OK
NM_001033425	Zscan10	4.41775	OSKM
NM_001033433	Tmem102	1.56616	K
NM_001033488	Gm1964	1.02877	K
NM_001033538	F730031O20Rik	1.08313	K
NM_001033954	Calca	5.77491	O
NM_001037279	2700094K13Rik	1.08866	OSM
NM_001038602	Marveld2	2.07537	K
NM_001038609	Mapt	2.83902	OSKM
NM_001038635	Stk35	1.05202	OSK
NM_001038653	Slc16a3	1.18489	M
NM_001038846	Rcsd1	2.64873	K
NM_001039059	Klhl15	1.79754	OS
NM_001039084	Mrpl1	1.70751	KM
NM_001039351	Nolc1	1.7694	M
NM_001039515	Arl4a	1.94141	M
NM_001039562	Ankrd37	1.1662	OK
NM_001039939	Asxl1	1.1416	OS
NM_001040400	E130014J05Rik	2.41325	O
NM_001040691	Ung	3.20325	K
NM_001042421	Kntc1	2.21928	K
NM_001042527	Blm	3.3035	O
NM_001042541	Akap1	1.32775	OK
NM_001042556	Bxdc1	1.24843	M
NM_001042675	LOC100044395 /// Rbpms	2.80511	O
NM_001042707	Ilf3	1.01772	S
NM_001046637	Snrpa	1.21263	M
NM_001077265	Hnrpd	1.32567	OSKM
NM_001079822	Tcf3	1.04019	OSK
NM_001080127	LOC100040661 /// LOC100044797 /// Rnps1	1.14653	M
NM_001080552	Gsg1	1.43722	OSK
NM_001080818	Cdc14a,Cdc14a /// LOC100047731	1.167	OK
NM_001080819	Arid1a /// LOC675933	1.66745	M
NM_001080927	Rbpj	2.12801	OS
NM_001081176	Polr3g	3.10907	K
NM_001081214	Pprc1	1.54426	M
NM_001081322	Myo5c	3.50709	OSKM
NM_001081350	Nol8	1.90441	M
NM_001081475	LOC100043974 /// Nasp	4.17053	M
NM_001081635	Ccnd3	1.57886	OKM
NM_001083120	Enah	1.35701	OS
NM_001083894	Liph	1.70529	OS
NM_007410	Adh5	1.31865	M
NM_007415	Parp1	2.09647	OKM
NM_007430	Nr0b1	10.9641	OSK
NM_007431	Akp2	3.74098	OSK
NM_007451	Slc25a5,EG433923 /// LOC631229 /// LOC667030 /// Slc25a5,EG433326 /// LOC383528 /// LOC630624 /// Slc25a5,EG433326 /// EG433923 /// EG623402 /// LOC630624 /// LOC631229 /// LOC667030 /// Slc25a5	1.35625	O
NM_007465	Birc2	1.20961	OSKM
NM_007499	Atm	1.19943	M
NM_007515	Slc7a3	4.08345	OSK
NM_007525	Bard1	3.94068	K
NM_007548	Prdm1	1.19733	OS
NM_007558	Bmp8a	1.11629	K
NM_007567	Bsn	1.21648	M
NM_007602	Capn5	1.57975	K
NM_007608	Car5a	1.37601	OSM
NM_007633	Ccne1	2.63843	M
NM_007659	Cdc2a	1.73846	KM
NM_007674	Cdx4	3.13116	O
NM_007702	Cidea	5.37219	OSK
NM_007706	Socs2	1.51586	OS
NM_007731	Col13a1	1.45829	K
NM_007792	Csrp2	1.16657	K
NM_007794	Ctcf	1.70621	KM
NM_007829	Daxx	1.02413	K
NM_007836	Gadd45a	1.26606	O
NM_007854	Slc29a2	1.39231	KM
NM_007863	Mpp3	1.09065	K
NM_007865	Dll1	1.68848	OS
NM_007900	Ect2	2.09933	OSKM
NM_007905	Phc1	4.43295	OSK
NM_007940	Ephx2	1.05223	OS
NM_007958	Smarcad1	1.81484	M
NM_007960	Etv1	2.97511	OS
NM_007971	Ezh2	2.31092	M
NM_007974	F2rl1	1.15284	OSK
NM_007989	Foxh1	4.35504	OSK
NM_007999	Fen1	1.42947	M
NM_008003	Fgf15	4.67042	OKM
NM_008009	Fgfbp1	2.75129	OS
NM_008081	B4galnt2	1.00197	K
NM_008108	Gdf3	5.90672	OSKM
NM_008116	Ggt1	1.40165	K
NM_008129	Gclm	1.39208	OSM
NM_008140	Gnat1	3.21618	O
NM_008157	Gpr19	1.99841	OS
NM_008188	Thumpd3	1.66018	M
NM_008224	Hcfc1	1.18069	KM
NM_008227	Hcn3	3.40015	K
NM_008234	Hells	3.18763	OSM
NM_008237	Hes3	1.61577	OK
NM_008253	Hmgb3	1.33366	O
NM_008300	Hspa4	1.28499	OSM
NM_008323	Idh3g	1.74705	M
NM_008342	Igfbp2	1.74635	OSM
NM_008447	Kif5a,Kif5a /// Kif5c	2.51027	OSK
NM_008452	Klf2	3.16107	OS
NM_008480	Lama1	1.83758	OSK
NM_008491	Lcn2	2.76765	M
NM_008492	Ldhb	1.7121	S
NM_008511	Lrmp	2.10586	OM
NM_008563	LOC100045677 /// Mcm3	2.56443	M
NM_008568	Mcm7	2.48836	M
NM_008590	Mest	1.29879	OSK
NM_008604	Mme	2.58665	OS
NM_008630	Mt2	2.75029	K
NM_008637	Nudt1	1.76098	O
NM_008652	Mybl2	4.65998	OSKM
NM_008695	Nid2	1.27935	OSKM
NM_008701	Nkx2-9	3.37927	K
NM_008709	Mycn	5.43491	OSK
NM_008765	Orc2l	1.87235	M
NM_008799	Pdcd2	1.66794	M
NM_008815	Etv4	2.86996	OS
NM_008842	Pim1	1.97357	KM
NM_008892	Pola1	3.08128	M
NM_008893	Pola2	2.00191	M
NM_008894	Pold2	1.62412	M
NM_008922	Prim2	1.35773	O
NM_008952	Pipox	4.06687	OSK
NM_008957	Ptch1	1.41355	OS
NM_008958	Ptch2,LOC674483 /// Ptch2	2.25076	O
NM_008988	Punc	1.68846	K
NM_008989	Pura,LOC100045958 /// Pura	1.31253	O
NM_009003	Rab4a	1.155	OSK
NM_009004	Kif20a	1.65411	M
NM_009009	Rad21	1.42167	M
NM_009012	Rad50	1.21464	M
NM_009013	Rad51ap1	1.7103	OSKM
NM_009033	Rbmxrt	1.10361	M
NM_009088	Rpo1-4	1.12407	M
NM_009107	Rxrg	1.84232	O
NM_009117	Saa1	3.60964	O
NM_009133	Stmn3	4.07895	K
NM_009171	Shmt1	2.60962	M
NM_009186	Sfrs10	1.06741	M
NM_009196	Slc16a1	2.09311	M
NM_009214	LOC671878 /// Sms	1.79945	OS
NM_009281	Zfp143	1.02252	M
NM_009303	Syngr1	2.0952	OSM
NM_009315	Taf6	1.03022	M
NM_009331	Tcf7	2.24787	OS
NM_009335	Tcfap2c	5.85206	OS
NM_009337	Tcl1	5.53156	OSK
NM_009360	Tfam	1.70432	M
NM_009372	Tgif1	1.28151	OSKM
NM_009426	Trh	6.81682	OS
NM_009445	Ttk	2.33097	M
NM_009448	EG626534 /// Tuba1c	1.22641	K
NM_009471	Umps	1.14928	K
NM_009477	Upp1	7.60296	OSK
NM_009482	Utf1	7.66283	OS
NM_009506	Vegfc	1.29321	OSK
NM_009513	Nrsn1	2.0377	O
NM_009514	Vpreb3	2.07274	S
NM_009516	Wee1	1.80197	OSKM
NM_009533	Xrcc5	2.71018	M
NM_009545	Pcgf2	1.72875	M
NM_009546	Trim25	1.51422	OSK
NM_009556	Zfp42	10.4787	OK
NM_009574	Zic2	3.05855	OSKM
NM_009575	Zic3	7.63902	OSKM
NM_009632	Parp2	1.86878	M
NM_009642	Agtrap	2.43559	OSK
NM_009646	Aire	4.73254	OSK
NM_009650	Akap3	2.03057	S
NM_009687	Apex1	1.08153	M
NM_009694	Apobec2	4.69495	O
NM_009696	Apoe	5.17819	O
NM_009737	Bcat2	1.186	OSK
NM_009764	Brca1	2.60757	OSM
NM_009769	Klf5	3.38987	OSKM
NM_009773	Bub1b	2.4387	OM
NM_009786	Cacybp	1.86293	OSM
NM_009791	Aspm	1.62342	M
NM_009839	Cct6b	1.48401	M
NM_009864	Cdh1	7.98459	O
NM_009897	Ckmt1	1.80785	K
NM_009900	Clcn2	2.57373	K
NM_009951	Igf2bp1	3.215	KM
NM_010014	Dab1	1.42683	OSK
NM_010022	Dbt	1.10033	OM
NM_010028	Ddx3x /// LOC100045923	1.06346	M
NM_010059	Dmc1	3.49224	OSK
NM_010071	Dok2	1.80329	M
NM_010094	Lefty1	4.47573	OSK
NM_010120	Eif1a	1.35865	OSKM
NM_010135	Enah	1.35701	OS
NM_010136	Eomes	2.84835	K
NM_010137	Epas1 /// LOC100048537	4.84954	O
NM_010139	Epha2	1.46082	K
NM_010153	Erbb3	3.60621	K
NM_010202	Fgf4	5.88901	O
NM_010243	Fut9	3.69455	OS
NM_010256	Gart	1.64528	M
NM_010262	Gbx2	5.55349	OS
NM_010264	Nr6a1	3.08412	OM
NM_010291	Gjb5	1.56543	K
NM_010296	Gli1	2.34585	OK
NM_010324	Got1	1.2825	M
NM_010346	Grb7	4.30048	K
NM_010351	Gsc	1.4809	OK
NM_010357	Gsta4	4.58143	OS
NM_010364	Gtf2h4	1.46962	S
NM_010407	Hck	2.11123	OK
NM_010413	Hdac6	3.1681	K
NM_010420	Hesx1	1.75365	OS
NM_010425	Foxd3	4.72377	OSK
NM_010436	H2afx	2.01699	OM
NM_010480	Hsp90aa1	1.14026	KM
NM_010613	Khsrp	1.29171	M
NM_010637	Klf4	3.08267	OSM
NM_010638	2310051E17Rik /// Klf9	1.67913	OSKM
NM_010655	Kpna2 /// LOC100039592 /// LOC100043906 /// LOC100046251	1.37838	M
NM_010693	Lck	3.53531	KM
NM_010703	Lef1	1.53572	O
NM_010721	Lmnb1	2.56746	KM
NM_010725	Lmx1b	1.04977	OS
NM_010762	Mal	4.0836	O
NM_010784	Mdk	3.54557	SK
NM_010804	Mllt10	1.17522	OSM
NM_010827	Msc	3.2711	K
NM_010830	Msh6	4.24946	OSKM
NM_010848	Myb	2.24966	OK
NM_010880	Ncl	1.17084	M
NM_010898	Nf2	1.05442	M
NM_010910	Nefl	8.17549	OSK
NM_010929	Notch4	3.26071	SK
NM_010931	Uhrf1	2.37452	OKM
NM_010938	Nrf1	2.03514	O
NM_011045	Pcna	1.36912	M
NM_011053	Pdcd11	1.08587	M
NM_011119	Pa2g4	1.3842	K
NM_011159	Prkdc	1.1678	M
NM_011172	Prodh	2.73573	M
NM_011232	Rad1	1.61709	OM
NM_011242	Rasgrp2	2.08183	K
NM_011258	Rfc1	1.49909	M
NM_011263	Rest	1.58136	OS
NM_011275	Rnaseh1	1.05149	M
NM_011284	Rpa2	2.25738	M
NM_011374	St8sia1	4.20422	O
NM_011378	Sin3a	2.02111	M
NM_011400	Slc2a1	2.67335	OK
NM_011401	Slc2a3	6.18393	OSM
NM_011405	Slc7a7	3.1427	KM
NM_011443	Sox2	6.80641	OSKM
NM_011482	EG434401 /// LOC637555 /// Nhp2l1	1.04289	M
NM_011487	Stat4	6.77003	OS
NM_011542	Tcea3	4.79492	OSK
NM_011552	Tcof1	2.47319	M
NM_011562	LOC100047300 /// Tdgf1	13.3549	OSK
NM_011574	Cirh1a	1.06206	M
NM_011588	Trim28	2.25599	OSKM
NM_011600	Tle4	4.21852	O
NM_011635	Trap1a	10.2356	M
NM_011638	Tfrc	1.05946	M
NM_011640	Trp53	1.24081	OSKM
NM_011670	Uchl1	1.38922	OSK
NM_011671	Ucp2	1.37107	K
NM_011746	Mkrn3	3.23414	OSM
NM_011747	Zfp13	1.21341	SK
NM_011813	Fiz1	1.48891	SM
NM_011858	Odz4	1.38583	OK
NM_011897	Spry2	1.27434	OSKM
NM_011900	Mpdu1	1.64351	M
NM_011972	Poli	2.11468	M
NM_011978	Slc27a2	6.54456	OS
NM_012006	Acot1 /// Acot2 /// LOC100044830,Acot1 /// LOC100044830	2.32011	S
NM_013415	Atp1b2	2.15263	O
NM_013462	Adrb3	1.73709	OK
NM_013469	Anxa11 /// LOC100039484 /// LOC100039503	1.64587	OSK
NM_013514	Epb4.9	2.70495	OSK
NM_013538	Cdca3	1.82668	M
NM_013545	Ptpn6	3.34946	K
NM_013552	Hmmr	1.9011	M
NM_013560	Hspb1	1.63958	K
NM_013611	Nodal	7.16032	OSK
NM_013614	Odc1,EG666231 /// EG668343 /// LOC546355 /// LOC627245 /// LOC632337 /// LOC665017 /// LOC676173 /// Odc1,EG666231 /// EG668343 /// LOC546355 /// LOC627245 /// LOC632337 /// LOC677259 /// Odc1	1.37768	M
NM_013627	Pax6	1.49175	OSK
NM_013633	Pou5f1	10.5459	OSKM
NM_013639	Prph	3.85939	K
NM_013670	Snrpn /// Snurf,LOC100044139 /// Snrpn /// Snurf	1.2033	K
NM_013672	Sp1	1.51032	K
NM_013692	Klf10	1.50158	K
NM_013720	Mga	1.78493	M
NM_013738	Plek2	1.09836	K
NM_013745	Nufip1	2.28477	M
NM_013807	Plk3	1.06726	K
NM_013820	Hk2 /// LOC100043412 /// LOC100047934	1.55943	OSKM
NM_013825	Ly75	2.09463	OK
NM_013827	Mtf2	3.99232	OS
NM_013869	Tnfrsf19	1.67007	OS
NM_013882	Gtse1	1.49867	OM
NM_013892	Pcsk1n	5.87026	K
NM_013898	LOC100039343 /// LOC100045062 /// Timm8a1	1.74048	M
NM_013902	Fkbp3	1.63077	OKM
NM_013925	Adat1	1.38275	M
NM_013932	Ddx25	3.42374	M
NM_015756	Shroom3	1.65891	OS
NM_015782	Snrpa	1.21263	SM
NM_015789	Dkkl1	2.24549	K
NM_015798	Fbxo15	10.0861	OSKM
NM_015810	Polg2	1.35126	K
NM_016688	LOC100048384 /// Pdcd7	2.28068	OSK
NM_016692	Incenp	2.1181	M
NM_016710	Nsbp1	1.04998	OS
NM_016750	H2afz,H2afz /// LOC626950,EG666634 /// H2afz	1.00469	O
NM_016754	Mylpf	5.08656	S
NM_016776	Mybbp1a	1.39273	M
NM_016777	LOC100043974 /// Nasp	4.17053	M
NM_016799	Srrm1	1.04564	M
NM_016809	Rbm3	1.7194	KM
NM_016875	LOC100045903 /// Ybx2	2.00422	K
NM_016889	Insm1	1.70474	O
NM_016915	Pla2g6	1.09109	M
NM_016926	Sart3	1.23447	OSKM
NM_016967	Olig2	5.78288	K
NM_017404	Mrpl39	1.2857	OSM
NM_017405	Lsr	1.33069	K
NM_018736	Mre11a	1.62951	OSM
NM_018749	Eif3d	1.25213	M
NM_018757	Nme6	1.19157	SM
NM_018857	Msln	1.74388	OK
NM_018868	Nol5	1.3904	M
NM_019392	LOC100048488 /// Tyro3	1.26796	OS
NM_019394	Mia1	1.50905	OS
NM_019434	Mcm3ap	1.66515	M
NM_019472	Myo10	1.11789	M
NM_019478	Pqbp1,LOC631302 /// Pqbp1	1.09608	K
NM_019501	Pdss1	1.53047	M
NM_019535	Sh3gl2	2.63558	O
NM_019547	Rbm38	2.47568	KM
NM_019553	Ddx21	1.48383	M
NM_019641	Stmn1,LOC100039888 /// LOC623112 /// Stmn1	2.05559	OSKM
NM_019643	Tera	2.61234	OSK
NM_019665	Arl6	1.02974	OSKM
NM_019668	Ube2a	1.69717	M
NM_019693	Bat1a	1.32979	OSM
NM_019703	Pfkp	1.84622	K
NM_019743	Rybp,EG628746 /// Rybp	1.85296	K
NM_019800	Acp6	3.00578	OS
NM_019807	Acpp	1.25506	OK
NM_019810	Slc5a1	1.56929	O
NM_019869	Rbm14	1.16219	OSK
NM_020005	Pcaf,EG330129 /// Pcaf	1.54125	O
NM_020046	Dhodh	1.81596	M
NM_020506	Xpo4,Lats2 /// Xpo4	1.30308	M
NM_020599	Rlbp1	4.23236	M
NM_020603	Wdr46	1.4642	M
NM_021099	Kit	5.40817	OSK
NM_021312	Wdr12	1.40104	M
NM_021315	Noc3l	1.226	M
NM_021390	Sall1	4.7099	OK
NM_021463	Prps1,AU021838 /// Prps1	3.04751	OSM
NM_021478	Tulp1	2.00458	K
NM_021480	Tdh	7.76205	O
NM_021512	Nup160	2.04764	M
NM_021523	Huwe1	1.34446	OSM
NM_021525	Rcl1	1.55177	M
NM_021610	Gpa33	4.94181	OK
NM_021714	Wbp11	1.18172	M
NM_021793	Tmem8	2.34401	OSK
NM_021878	Jarid2	5.37389	OSK
NM_021891	Fignl1	2.19535	M
NM_022015	Taf8	1.33497	M
NM_022032	Perp	2.16319	K
NM_022409	Zfp296	5.13263	K
NM_022722	Dpys	2.9403	O
NM_022724	Suv39h2	1.93642	O
NM_022880	Slc29a1	1.40115	M
NM_022889	Pes1	1.17157	M
NM_022981	Zfp110	1.46327	SM
NM_022987	LOC100045988 /// Zic5	2.76925	OSKM
NM_023040	Gfer	1.03356	KM
NM_023047	Dpysl5	1.9795	K
NM_023130	Raly	1.07872	K
NM_023136	Dtymk	1.80362	M
NM_023203	2410015N17Rik	2.09131	M
NM_023223	Cdc20	2.06445	OSK
NM_023279	Tubb3	1.28213	SK
NM_023294	Ndc80	1.62404	OM
NM_023323	Bxdc1	1.24843	M
NM_023517	Tnfsf12-tnfsf13 /// Tnfsf13	2.66879	M
NM_023595	Dut	1.04643	O
NM_023662	Pcm1,LOC100044052 /// Pcm1	1.41101	S
NM_023671	Clns1a	1.17615	M
NM_023716	LOC627110 /// LOC631582 /// Tubb2b	1.62945	OSKM
NM_023755	Tcfcp2l1	6.47717	OS
NM_023794	Etv5	3.79462	OM
NM_023844	Jam2	4.60709	OSK
NM_023871	LOC671392 /// Set	1.27978	M
NM_023884	Ralgps2	1.84625	OSK
NM_024187	LOC100040029 /// LOC100044330 /// LOC629480 /// LOC638488 /// U2af1	1.63051	M
NM_024193	Nol5a	1.5517	M
NM_024230	Smtnl1	2.50027	M
NM_024246	Tmem79	2.06797	OSKM
NM_024428	2810410M20Rik	2.38518	OSM
NM_024434	Lap3	1.53743	OSK
NM_025274	Dppa5	9.06963	OSK
NM_025285	Stmn2	3.54683	OSK
NM_025300	Mrpl15	1.88431	M
NM_025310	Ftsj3	1.60777	M
NM_025363	1110001J03Rik	1.17379	OSM
NM_025372	Tipin	2.36215	M
NM_025394	Tomm7	1.01829	M
NM_025415	Cks2 /// LOC100039474 /// LOC100044764,Cks2 /// LOC100039474 /// LOC100044750 /// LOC100044764	1.37101	KM
NM_025433	Rpl7l1	1.00325	M
NM_025454	Ing5	1.04761	M
NM_025465	1810029B16Rik,1810029B16Rik /// LOC383495 /// LOC675103	1.50627	M
NM_025495	Cenpp	2.4138	M
NM_025512	Zfand1	1.21225	O
NM_025538	Alkbh7	1.81208	K
NM_025599	2610528E23Rik,2610528E23Rik /// Frag1	2.24981	M
NM_025615	2810004N23Rik	1.34414	M
NM_025654	Rdm1	2.29246	M
NM_025656	Sip1	1.95805	KM
NM_025660	Ribc1	2.10506	M
NM_025663	Gpatch4	1.80555	M
NM_025676	Mcm8	1.56559	M
NM_025682	Pspc1	1.44478	M
NM_025705	Dcbld1	1.66326	O
NM_025768	Grtp1	3.79646	OK
NM_025795	Ncaph2,EG665187 /// LOC435507 /// Ncaph2	1.22749	KM
NM_025814	Serbp1	1.95471	M
NM_025819	1200016B10Rik	1.07006	S
NM_025866	Cdca7	2.64087	OKM
NM_025877	Slc25a23	2.04113	OK
NM_025881	Luc7l	1.15112	M
NM_025903	Ifrd2	1.23292	M
NM_025914	Actr6	1.02941	M
NM_025923	Fancl /// LOC100044333	1.39844	M
NM_025927	Mrpl45	1.35288	OM
NM_025934	Riok2	1.44485	M
NM_025939	Paics	1.30569	OK
NM_025962	Mmachc	1.09274	SM
NM_025967	D16Ertd472e	1.17453	O
NM_025970	Zbtb8os	1.0342	M
NM_025995	Fbxo5	2.39885	OSM
NM_026001	Rnaseh2b	1.44269	M
NM_026014	Cdt1	2.67144	M
NM_026023	Nudcd2	1.08556	M
NM_026024	Ube2t,LOC100047829 /// Ube2t	2.81777	M
NM_026028	Ccdc77	1.63838	M
NM_026041	Rrp15	1.46749	M
NM_026053	Gemin6	1.86137	M
NM_026067	Thex1	1.16416	KM
NM_026091	1700037H04Rik	1.65321	KM
NM_026101	Herc4	1.93392	S
NM_026115	Hat1	3.12022	OSM
NM_026116	Bbs2	1.72541	O
NM_026120	2410127L17Rik /// LOC677553,2410127L17Rik /// EG665401 /// LOC677553	1.81468	OSKM
NM_026138	6330407J23Rik	2.66718	OSK
NM_026197	Mett10d	1.00315	M
NM_026276	Aasdhppt /// LOC100044211	1.21715	M
NM_026301	Rnf125	3.22466	OSKM
NM_026310	Mrpl18	1.06804	M
NM_026312	2610029G23Rik	1.39388	M
NM_026352	Lamp3 /// LOC100043444 /// LOC100044418 /// LOC100045251 /// LOC100046743 /// Ppid	1.62867	M
NM_026391	Ppp2r2d	1.48393	OS
NM_026396	Bxdc2	1.57413	M
NM_026410	Cdca5	2.64347	OS
NM_026415	2310002J15Rik	1.87185	KM
NM_026421	Enoph1	1.36619	OSKM
NM_026440	Rnmt	1.2382	M
NM_026443	1700020C11Rik	2.55727	M
NM_026472	Mki67ip	1.07859	SM
NM_026476	2610101N10Rik	1.12855	M
NM_026480	2410146L05Rik	5.4813	OK
NM_026483	Mphosph10	1.13246	M
NM_026489	Hormad1 /// LOC667735 /// LOC675573	8.27891	M
NM_026506	Snrpg,EG666609 /// Snrpg	1.27423	M
NM_026507	Zwilch	1.78751	SM
NM_026508	Trap1	1.10709	M
NM_026560	Cdca8	2.01021	M
NM_026574	Inoc1 /// LOC100048476	1.80642	KM
NM_026576	Etaa1	2.56155	OS
NM_026626	Efcab2	1.89288	OS
NM_026631	Nola2	1.92541	M
NM_026643	2410017P07Rik	1.72127	M
NM_026737	Phf5a	1.06003	SM
NM_026785	Ube2c	1.91194	KM
NM_026792	Agpat5	1.09944	M
NM_026810	Mlh1	1.81685	M
NM_026820	Ifitm1	3.60977	OSK
NM_026877	Aspscr1	1.873	K
NM_026890	Ngdn	1.13849	M
NM_026967	Rhebl1	2.50146	K
NM_026975	Bola1	2.37949	M
NM_027000	Gtpbp4	1.54035	M
NM_027030	Dcps	1.14088	M
NM_027040	1700007K13Rik	1.09725	OS
NM_027052	Slc38a4	1.20505	M
NM_027106	Avpi1	2.30288	OKM
NM_027184	Ipmk	2.52707	OSK
NM_027204	Mrpl12	1.3522	K
NM_027213	Med6	1.09193	OSM
NM_027227	Glod5	5.03699	OS
NM_027248	Zfp219	1.26573	OSK
NM_027250	2010305A19Rik	1.6508	M
NM_027256	Ints4	1.63672	M
NM_027261	Josd3,Josd3 /// LOC666781	1.1138	M
NM_027275	Ptcd3	1.42342	M
NM_027279	2810422O20Rik	1.50684	M
NM_027297	Prpf4	1.13652	O
NM_027429	Cenpl	1.36329	SM
NM_027432	Wdr77	1.54926	M
NM_027470	Pak4	1.05478	K
NM_027494	Zcchc8	1.0105	OS
NM_027541	Prpf3	1.51822	M
NM_027545	Cwf19l2,Cwf19l2 /// LOC100044213	1.37503	O
NM_027649	Spats1	3.38772	KM
NM_027689	Rfx4	2.30646	OS
NM_027782	Kctd6	1.35476	M
NM_027931	Tars2	1.18241	M
NM_027941	Lrrc34	6.56697	OK
NM_027982	Ppm1j	1.13546	K
NM_028002	Dus4l	1.27256	M
NM_028030	Rbpms2	1.8261	K
NM_028039	Esco2	3.77701	M
NM_028040	Rpusd4	1.08712	KM
NM_028064	Slc39a4	4.31021	K
NM_028072	Sulf2	1.03664	OSK
NM_028109	Tpx2	1.23491	M
NM_028112	Seh1l	1.28514	M
NM_028119	Ddb2	1.44176	O
NM_028189	B3gnt3	2.12513	O
NM_028232	Sgol1	2.05582	M
NM_028242	Htatsf1	1.06436	M
NM_028244	Rrp1b	2.15402	M
NM_028276	Utp14a	2.1378	OSM
NM_028288	Cul4b	2.44201	SK
NM_028315	Dis3	1.52675	M
NM_028354	Tdp1	1.00619	KM
NM_028417	Ttc9b	3.06663	K
NM_028603	2410081M15Rik	2.0781	OK
NM_028679	Irak3	2.71974	KM
NM_028727	Nol9	1.52234	O
NM_028760	Cep55	1.95954	O
NM_028838	Lrrc2	6.96258	OSKM
NM_028894	Lonrf3	3.61035	K
NM_028904	Rmi1	1.30681	S
NM_028908	4933403G14Rik	1.40615	OS
NM_028913	Zfp819	4.15709	OSK
NM_028984	8430406I07Rik	2.17372	O
NM_029001	Elovl7	1.59148	OK
NM_029081	5730419I09Rik	1.92514	O
NM_029086	5830415F09Rik	2.04443	M
NM_029128	Qtrtd1	1.20496	M
NM_029157	Sf3a3	1.13232	O
NM_029231	Pelp1	2.40847	OSKM
NM_029444	Six6os1	4.37892	M
NM_029510	Bcor	1.01618	O
NM_029556	Clybl	1.00683	K
NM_029607	2310003C23Rik	1.24415	OSKM
NM_029609	2310007H09Rik	1.24161	OSK
NM_029705	Atxn3	1.08387	M
NM_029747	2410137M14Rik	2.52643	OSK
NM_029766	Dtl	1.60671	M
NM_029801	1700021C14Rik	1.85585	M
NM_029835	5730590G19Rik /// LOC100047683	3.74098	OK
NM_029939	C330001K17Rik	2.39024	S
NM_030014	Hook1	5.41583	OSM
NM_030066	Armcx1	1.09872	OS
NM_030100	Wibg	2.49629	K
NM_030147	Brd8	1.03064	M
NM_030172	2610021K21Rik	1.15139	KM
NM_030188	Ttc30a1	1.32791	OS
NM_030255	Apobec3	2.88344	K
NM_030560	BC003993 /// LOC100038980 /// LOC100039088 /// LOC100039101 /// LOC100039204 /// LOC100039404 /// LOC100040136 /// LOC100040620 /// LOC100040646 /// LOC100040656 /// LOC100040790 /// LOC100040936 /// LOC100041238 /// LOC100041416 /// LOC100042151 /// LOC100042341 /// LOC100042551 /// LOC100042748 /// LOC100043165 /// LOC100043211 /// LOC100043316 /// LOC100043783 /// LOC100043829 /// LOC100043874…	2.22878	M
NM_030722	Pum1	1.09546	K
NM_031173	Cacnb1	1.72141	M
NM_031182	Tcfap4	1.7884	OKM
NM_031252	Il23a	2.35189	OSM
NM_031405	Ars2	1.06577	OM
NM_031877	Wasf1	1.94232	SM
NM_033174	Snrpn /// Snurf,LOC100044139 /// Snrpn /// Snurf,LOC545062 /// Snurf	1.17081	OS
NM_033269	Chrm3	1.39342	O
NM_033526	Ubqln4	1.63449	M
NM_033573	Prcc	1.11019	SM
NM_053008	Olig3	1.1829	OS
NM_053261	Impa2	2.71853	OSKM
NM_053269	Rad51c	2.01737	M
NM_054052	B3gnt5	2.01626	OKM
NM_054085	Alpk3	2.61766	K
NM_054088	Pnpla3	2.05535	OSK
NM_080446	Helb	1.99932	O
NM_080452	Mrps2	1.30646	OS
NM_080471	Ankrd6	2.52979	OSK
NM_080848	Wdr5	2.37604	OSKM
NM_130450	Elovl6	1.70625	M
NM_130878	Pcdh21	2.71019	OK
NM_130889	Anp32b	1.18393	M
NM_133218	Zfp704	1.17201	OSKM
NM_133227	Nup155	1.36854	M
NM_133229	Ripply3	1.10654	K
NM_133250	Mutyh	1.49999	M
NM_133255	Hook2	1.84322	K
NM_133347	Dhx30	1.05073	M
NM_133756	Xab1	1.58433	M
NM_133767	Mtif2	1.24372	M
NM_133787	Nmd3	1.39706	OM
NM_133815	Lbr	2.04587	K
NM_133834	Hnrpf /// LOC637008,EG665008 /// Hnrpf /// LOC630791 /// LOC637008	1.14202	KM
NM_133878	Rcc1	1.43602	M
NM_133928	Chchd4	1.39677	M
NM_133953	Sf3b3	1.0582	M
NM_133966	Taf5l	1.24603	M
NM_133987	Slc6a8	1.20552	K
NM_133991	Ftsj1 /// LOC100044636	1.43889	OSM
NM_133992	Usp52	1.63105	OSM
NM_133993	Pwp1	1.0167	M
NM_134005	Enpp3	2.96255	OS
NM_134007	Cisd1	1.49029	OSK
NM_134038	Slc16a6	2.90413	OKM
NM_134048	Cbll1	1.15999	KM
NM_134062	Dapk1	1.06766	K
NM_134077	Rbm26	1.20471	M
NM_134097	Topors	1.21813	M
NM_134122	Nrm	1.58834	K
NM_134138	LOC100047604 /// Tnfsf5ip1	1.08881	M
NM_134139	Wdr74	1.07421	M
NM_134251	Slc12a8	1.76723	OSKM
NM_138313	Bmf	1.13878	K
NM_138586	Exosc5	2.07127	M
NM_138593	Larp7 /// LOC100047322	1.08187	OS
NM_138599	Tomm70a	1.09502	M
NM_138745	Mthfd1	2.01789	M
NM_138747	Nol1	1.32334	M
NM_138756	Slc25a36	1.14238	OSK
NM_139218	Dppa3	3.2484	OSK
NM_139303	Kif18a	2.25342	OS
NM_139311	Mllt6	1.4581	OSK
NM_144800	Mtss1	1.53133	OS
NM_144804	Depdc7	2.62202	K
NM_144811	Cbx7	4.70289	OSKM
NM_144818	Ncaph	1.3699	K
NM_144835	Heatr1	1.5586	M
NM_144841	Otx2	9.57415	K
NM_144869	BC021614	2.5388	OSK
NM_144886	Exosc2	1.69035	M
NM_144921	Atp1a3	1.42011	K
NM_145227	Oas2	1.36562	OSK
NM_145381	Lactb2	1.0565	OSKM
NM_145404	Prmt7	1.07257	M
NM_145463	Tmem46	2.54716	OSK
NM_145508	Dyrk3	2.93957	OSKM
NM_145610	Ppan	1.73061	M
NM_145620	Rrp9	1.67193	M
NM_145742	Dhx35	1.27613	OSM
NM_145819	Mzf1	2.78846	O
NM_145833	Lin28	8.43838	M
NM_145908	Porcn	4.18227	OSK
NM_145927	Fntb	2.8134	M
NM_145938	Rpp40	2.0308	M
NM_145946	Fanci	1.94106	M
NM_145973	Ell3	3.3997	K
NM_145974	C330016O10Rik	2.43192	SK
NM_145993	L3mbtl2	2.62215	OS
NM_146010	Tspan8	1.27977	O
NM_146068	2310008H04Rik	1.27024	KM
NM_146074	Tfb1m	1.09815	M
NM_146089	Ccdc5	1.85059	KM
NM_146100	Ina /// LOC100047943	4.91361	K
NM_146116	Tubb2c,LOC100042651 /// LOC100044717 /// LOC665829 /// Tubb2c	1.2402	M
NM_146151	Tesk2	1.42037	S
NM_146183	Zfp428	3.9729	OSK
NM_146198	Slc5a11	2.45736	O
NM_146222	BC024479	1.73006	OSKM
NM_147217	Gprc5c /// LOC100044349	1.50494	K
NM_148952	E2f4	1.77562	OK
NM_152814	Zfp566	1.69387	OKM
NM_152822	Las1l,Las1l /// LOC100044857	1.49006	OSM
NM_152895	Jarid1b	1.80576	OKM
NM_152947	Ovol2	2.42694	OK
NM_153062	Slc37a1	3.22562	OKM
NM_153063	Zfp472	1.35702	M
NM_153116	Gtpbp10	1.50638	SM
NM_153126	Nat10	1.37005	M
NM_153389	Atp10d	1.10293	SK
NM_153404	Liph	1.70529	O
NM_153419	Grwd1	1.04626	OK
NM_153457	Rtn1	3.04643	K
NM_153783	LOC100046988 /// LOC624275 /// Paox	1.27855	K
NM_153806	Dnttip2	1.46486	M
NM_172284	Ddx19b,Ddx19a /// Ddx19b	1.51085	SM
NM_172285	Plcg2	1.93003	OSK
NM_172453	Pif1	1.59721	KM
NM_172472	Tcfe3	1.36408	OSK
NM_172478	Tbc1d25	1.40904	M
NM_172480	Mtrr	1.316	M
NM_172496	Cobl	4.66067	OSK
NM_172517	Rbbp5	1.46435	O
NM_172562	Tada2l	1.49261	M
NM_172584	Itpk1	2.84692	OK
NM_172599	D14Ertd436e	1.74126	O
NM_172644	Dars2	1.41751	SM
NM_172658	Slco4c1	2.75587	OK
NM_172665	Pdk1	1.56718	OK
NM_172683	Pogz	1.86809	S
NM_172709	Otop1	1.69686	OSK
NM_172713	Sdad1	1.18209	M
NM_172746	Hirip3	2.07274	M
NM_172782	Nxt2	2.62193	M
NM_172824	Ccdc14	3.64981	OKM
NM_172826	Dact2	2.08382	OK
NM_172860	Cbfa2t2	1.21692	O
NM_172914	Ccdc113	2.30772	O
NM_172958	Mtmr12	1.78741	OSK
NM_173001	Jmjd1a	2.32473	SM
NM_173732	BC030440	1.67073	OSKM
NM_173737	8430410A17Rik	2.17719	OSK
NM_173757	Mrps27	1.36951	M
NM_173867	Rcc2,LOC100047340 /// Rcc2	1.8361	OSKM
NM_174852	Phf12	1.32432	OSKM
NM_174960	Gimap9	2.42229	OS
NM_175016	Alkbh2	1.2026	K
NM_175027	Fancb	1.39898	M
NM_175033	BC089491	2.15343	O
NM_175111	Hspbap1	2.87653	KM
NM_175146	Tsr2	1.48359	M
NM_175175	Plekhf2	2.13213	O
NM_175238	Rif1	3.54855	OSKM
NM_175263	Notum	3.70459	K
NM_175276	Fhod3	1.44301	K
NM_175294	Nucks1	1.07515	OSK
NM_175303	Sall4	10.0694	OS
NM_175328	Slc6a15	2.72339	OK
NM_175337	Mlh3	1.14625	OSKM
NM_175384	Cdca2	2.4954	SM
NM_175482	Usp28	2.28506	M
NM_175488	Ccdc38	1.41292	OSM
NM_175503	Aard	7.43949	O
NM_175507	LOC100047579 /// Tmem20	2.98266	K
NM_175641	Ltbp4	2.36476	K
NM_175668	Gpr4	4.61302	K
NM_175749	Nup153	1.17878	OSM
NM_176834	Rnf208	1.39826	KM
NM_176951	Xkr5	1.75306	KM
NM_177099	Lefty2	6.51829	OSK
NM_177150	Cenpt	1.07556	O
NM_177193	Islr2	3.08413	K
NM_177230	4932413O14Rik	2.61316	OS
NM_177294	Rpap1	1.63754	OS
NM_177301	Hnrpl	1.13908	SM
NM_177303	B430119L13Rik	1.73434	S
NM_177331	5830483C08Rik	1.57566	M
NM_177343	Camk1d	2.63025	K
NM_177566	Arhgef15 /// LOC100045735	1.11198	K
NM_177619	Myst2	1.08418	OSK
NM_177625	Ttc5	1.01216	OK
NM_177640	D030056L22Rik	1.32821	S
NM_177776	Smtnl2	4.65162	K
NM_177788	Exoc3l	4.26711	OK
NM_177857	Dennd2c	2.88007	OSK
NM_178017	Hmgb2l1 /// LOC100045749	1.08633	K
NM_178087	Pml	1.82869	OK
NM_178269	Cenpm	3.53178	OS
NM_178280	Sall3	3.96082	OS
NM_178446	BC013481	1.57255	O
NM_178601	Imp4	1.12303	M
NM_178610	Krr1	1.55106	M
NM_178625	2700094F01Rik	1.09349	M
NM_178670	8030462N17Rik	2.25272	OSKM
NM_178703	Slc6a1	4.05655	O
NM_178727	D630039A03Rik	1.92165	OSK
NM_178846	Gnl3	1.2075	M
NM_178876	Ints3	1.47379	M
NM_178892	Tiparp	1.58629	O
NM_178907	Mapkapk3	1.39524	K
NM_178909	Wdr92	1.08068	KM
NM_178912	Fancm	1.20314	O
NM_178918	Utp15	1.17582	M
NM_178935	4932441K18Rik	2.76311	OSK
NM_179203	Atad3a	1.54461	M
NM_181416	Arhgap11a	1.24015	S
NM_181423	Supv3l1	1.09716	M
NM_181577	Ccdc85a	2.33583	OK
NM_182993	Slc17a7	1.89512	K
NM_182995	6330503K22Rik	1.94012	OK
NM_183014	Zfp184	2.49882	OSM
NM_183088	2410018M08Rik,2410018M08Rik /// Chchd2 /// LOC100045688	1.32788	OSK
NM_183115	Ccdc125	1.42387	M
NM_183204	Rnf182	1.56668	OS
NM_183278	2200001I15Rik	3.99791	O
NM_183287	2610318N02Rik	3.28671	M
NM_183288	5730442P18Rik	3.43346	K
NM_183392	Nup54,LOC100042745 /// LOC100047437 /// Nup54	1.71582	M
NM_197988	1190005I06Rik	3.79071	OK
NM_198033	Setx	2.13315	OS
NM_198110	Gnl3l	1.12706	SM
NM_198223	Aspscr1	1.873	OK
NM_198246	Yars2	1.05765	OSM
NM_198421	Med20 /// Usp49	1.22382	O
NM_198610	Igsf21	4.21222	K
NM_198645	Ccdc58	1.48134	M
NM_198932	Pou2f1	2.38545	OSKM
NM_199028	AK122525	1.52603	OSM
NM_199143	Znrf2	1.37994	K
NM_199196	Suz12	2.08485	M
NM_199304	Zfp341	1.41462	M
NM_201365	BC050210	4.13046	M
NM_201371	Prmt8	6.77962	OS
NM_201396	Sall4	10.0694	OSM
NM_207161	BC048355	1.94377	M
NM_207264	BC052040 /// LOC100048589	2.43109	M
NM_207685	Elavl2	3.12002	OSK
NM_207686	Elavl2	3.12002	O
NM_211138	Pcyt1b	3.89263	OSK
